# Supplementary material
Source: PubMed Central journal article supplement (PMC6439695)
Supplement: jama-321-1165-s004.pdf [file jama-321-1165-s004.pdf]

# Data Sharing Statement

Kirpalani. Effect of Sustained Inflations vs Intermittent Positive Pressure Ventilation on Bronchopulmonary Dysplasia or Death Among Extremely Preterm Infants. *JAMA*. Published March 26, 2019. 10.1001/jama.2019.1660

## Data

**Data available:** Yes

**Data types:** Deidentified participant data

**How to access data:** [sir7pc@virginia.edu](mailto:sir7pc@virginia.edu) [kirpalanih@email.chop.edu](mailto:kirpalanih@email.chop.edu)

**When available:** beginning date: 01-30-2021

## Supporting Documents

**Document types:** None

## Additional Information

**Who can access the data:** researchers whose proposed use of the data has been approved

**Types of analyses:** for a specified purpose

**Mechanisms of data availability:** Access to SAIL data requires an association with the study and agreement to abide by study policies and procedures. Nonparticipating site investigators may request ancillary analyses, but a SAIL investigator(s) must be directly involved as co-investigator(s). Data access is provided to Investigators, Collaborators, or Ancillary Study Investigators for research on completion of the following procedures: (1) A paper proposal must be approved for each paper, prior to request for data. At minimum 2 pages should describe the research question, main goals, and initial analytical approach. We encourage multisite collaboration for these secondary studies. The proposal is reviewed by the Steering Committee for consistency with the goals of the SAIL study, lack of overlap with other work, and scientific integrity. All persons who will have access to study data need to be named on the proposal. If there is a change of analyst (someone new who will access the data), the name of the new analyst needs to be communicated to the Steering Committee coordinator for study records. Proposals can be emailed to either Sarah Ratcliffe, or Haresh Kirpalani.

**Any additional restrictions:** seeking investigator must fund needed transfers
